# Supplementary material
Source: Springer Nature journal article supplement (https://www.springermedizin.de/resource/supplementary/12885_2009_1949_MOESM8_ESM.pdf/9460162)
Supplement: MOESM8 [file 9460162]

## Concordance between first diagnosis and the expert review

Table 6: Comparison of concordance results in the two groups

|                                  | Requested SO group | Control group | <i>p</i>          |
|----------------------------------|--------------------|---------------|-------------------|
| Included patients                | 188 (100%)         | 178 (100%)    |                   |
| <i>Concordance</i>               |                    |               |                   |
| <b>Zero</b>                      | 53 (28.2%)         | 17 (9.6%)     | <i>&lt;0.001.</i> |
| <b>Partial</b>                   | 53 (28.2%)         | 44 (24.7%)    |                   |
| <b>Full</b>                      | 82 (43.6%)         | 117 (65.7%)   |                   |
| Included patients                | 106 (100%)         | 61 (100%)     |                   |
| <i>Type of discordance</i>       |                    |               |                   |
| <b>Subtype alone</b>             | 10 (9.4%)          | 7 (11.5%)     | <i>&lt;0.001</i>  |
| <b>Grade alone</b>               | 31 (29.2%)         | 37 (60.7%)    |                   |
| <b>Histological type alone</b>   | 27 (25.5%)         | 12 (19.7%)    |                   |
| <b>Grade + Subtype</b>           | 13 (12.3%)         | 0 (0%)        |                   |
| <b>Grade + Histological type</b> | 25 (23.6%)         | 5 (8.2%)      |                   |
